# Supplementary material
Source: publisher site journal article supplement (https://www.spandidos-publications.com/438/downloadSupplementary)
Supplement: Supplementary file 1 [file downloadSupplementary]

Figure S1. Scatter plots of Pearson correlation analysis between age and miRNA expression profiles in the serum groups. (A) miRNA-365-5p. (B) miRNA-24-2-5p. (C) miRNA-548b-5p. (D) miRNA-375. (E) miRNA-665-3p. miRNA, microRNA; BCS, breast cancer serum; NCS, normal control serum.

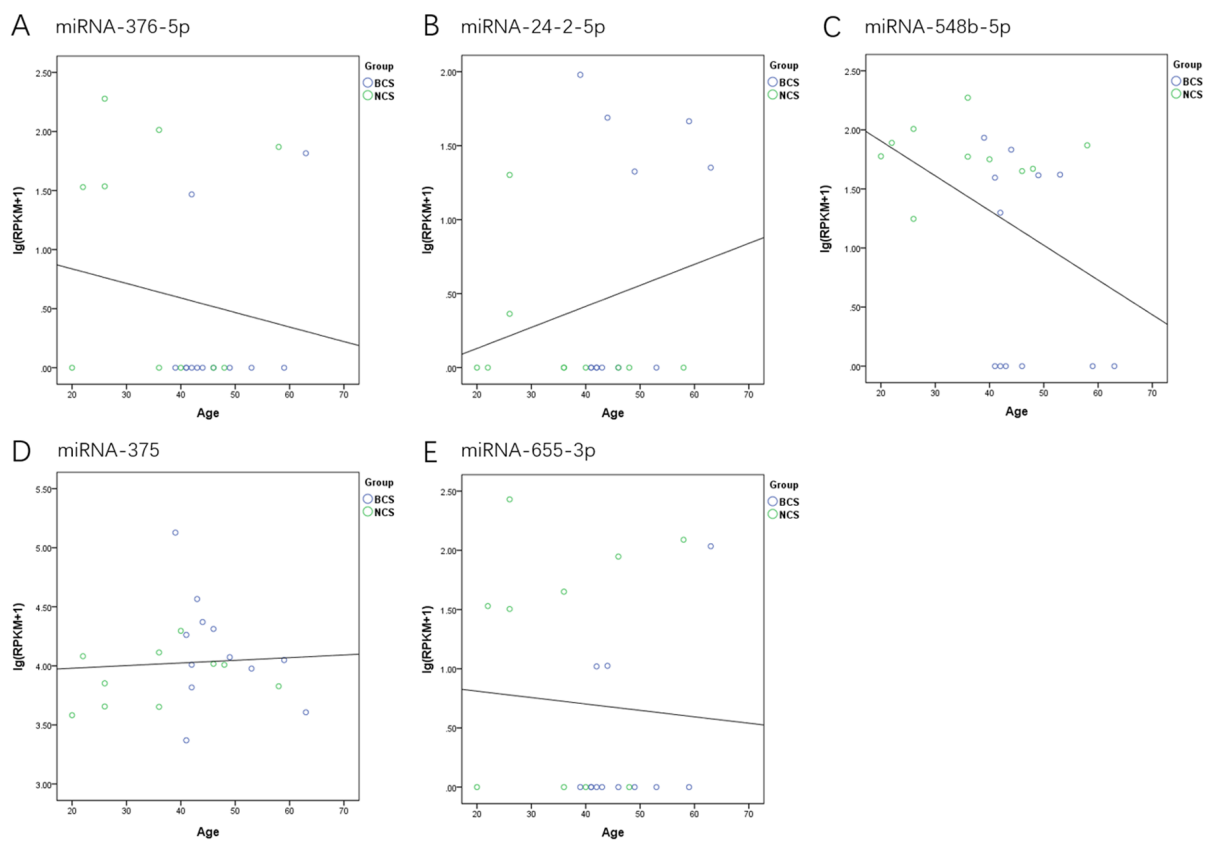

Figure S2. Kaplan-Meier analysis of miRNA-376b-5p in other types of cancer. miRNA, microRNA; BLCA, bladder urothelial carcinoma; PAAD, pancreatic adenocarcinoma; COAD, colon adenocarcinoma; READ, rectum adenocarcinoma; STAD, stomach adenocarcinoma.

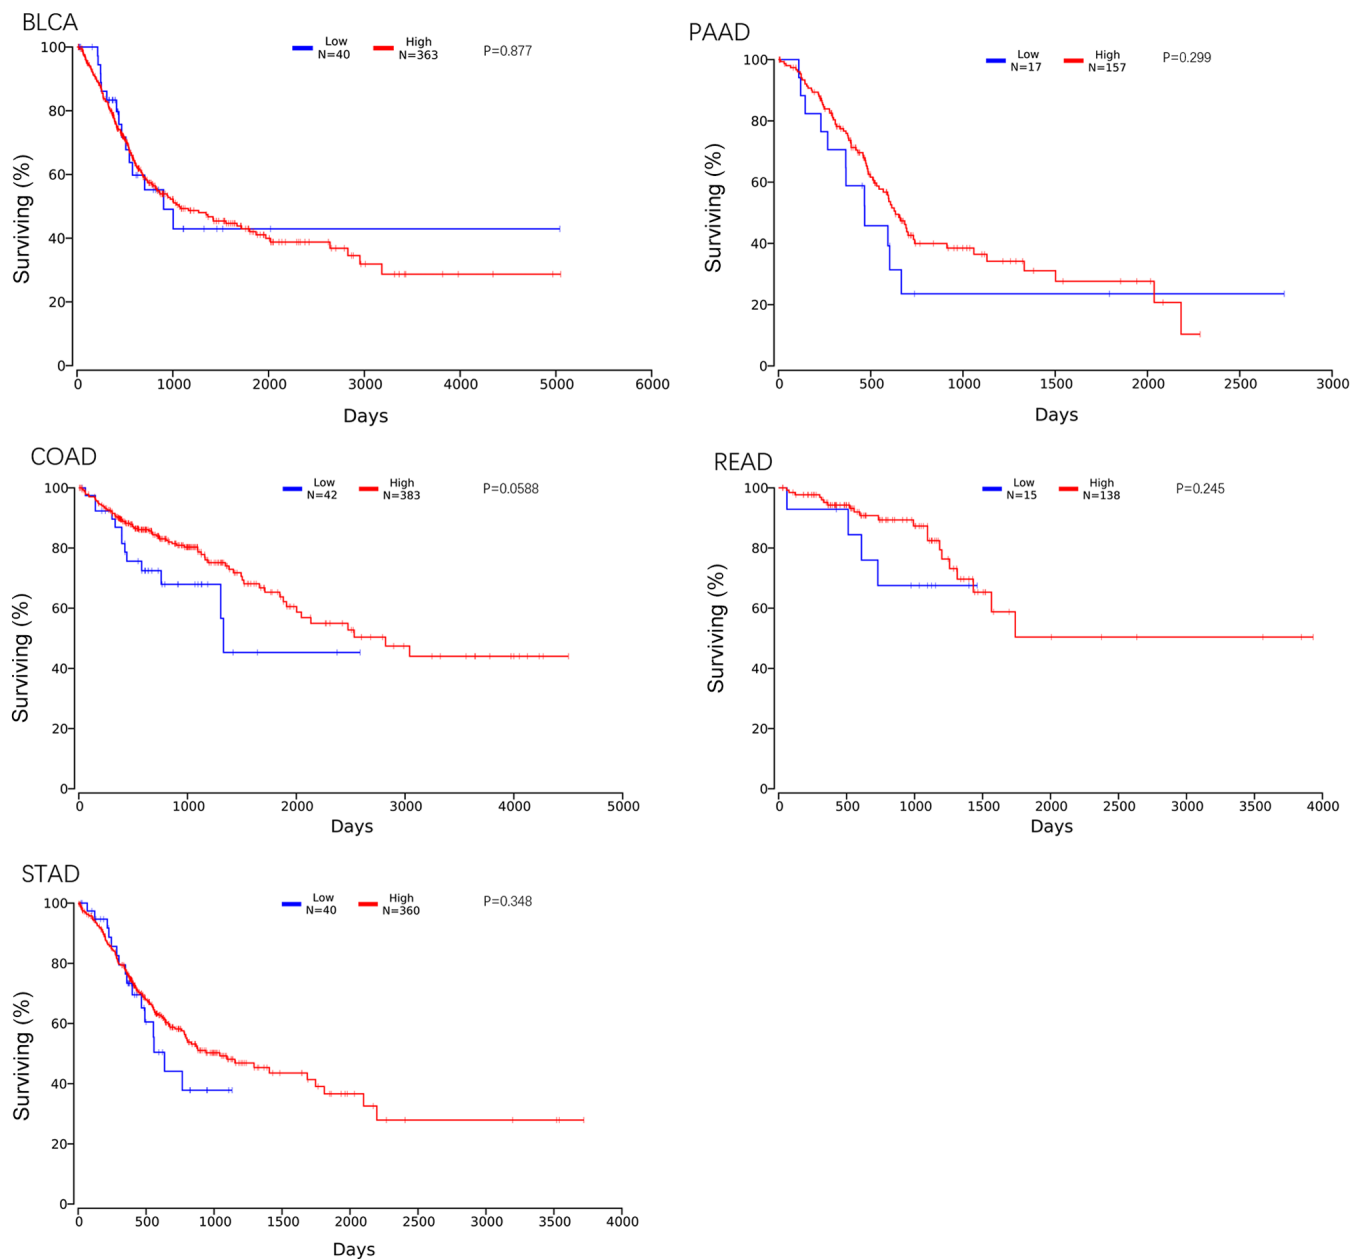

Table SI. Bivariate correlation analysis between age and miRNAs.

| miRNA         | Age    |         |
|---------------|--------|---------|
|               | R      | P-value |
| miRNA-375     | -0.026 | 0.908   |
| miRNA-24-2-5p | 0.159  | 0.480   |
| miRNA-548b-5p | -0.370 | 0.09    |
| miRNA-655-3p  | -0.066 | 0.771   |
| miRNA-376b-5p | -0.189 | 0.400   |

miRNA, microRNA.
